1 **Identification of regulatory targets for the bacterial Nus factor complex**

2

3 Gabriele Baniulyte<sup>1,2</sup>, Navjot Singh<sup>1</sup>, Courtney Benoit<sup>1</sup>, Richard Johnson<sup>1,2</sup>, Robert Ferguson<sup>1</sup>, Mauricio

4 Paramo<sup>1</sup>, Anne M. Stringer<sup>1</sup>, Ashley Scott<sup>1</sup>, Pascal Lapierre<sup>1</sup>, and Joseph T. Wade<sup>1,2,3</sup>

5

6 <sup>1</sup>Wadsworth Center, New York State Department of Health, Albany, New York, USA.

7 <sup>2</sup>Department of Biomedical Sciences, School of Public Health, University at Albany, Albany, New York, USA.

8 <sup>3</sup>Corresponding author: [joseph.wade@health.ny.gov](mailto:joseph.wade@health.ny.gov)

9

10 **ABSTRACT**

11 Nus factors are broadly conserved across bacterial species, and are often essential for viability. A complex of  
12 five Nus factors (NusB, NusE, NusA, NusG and SuhB) is considered to be a dedicated regulator of ribosomal  
13 RNA folding, and has been shown to prevent Rho-dependent transcription termination. We have established the  
14 first cellular function for the Nus factor complex beyond regulation of ribosomal assembly: repression of the  
15 Nus factor-encoding gene, *suhB*. This repression occurs by translation inhibition followed by Rho-dependent  
16 transcription termination. Thus, the Nus factor complex can prevent or promote Rho activity depending on the  
17 gene context. Extensive conservation of NusB/E binding sites upstream of *nus* factor genes suggests that Nus  
18 factor autoregulation occurs in many species. Putative NusB/E binding sites are also found upstream of many  
19 other genes in diverse species, and we demonstrate Nus factor regulation of one such gene in *Citrobacter*  
20 *koseri*. We conclude that Nus factors have an evolutionarily widespread regulatory function beyond ribosomal  
21 RNA, and that they are often autoregulatory.

## 28 INTRODUCTION

29 Nus factors are widely conserved in bacteria and play a variety of important roles in transcription and  
30 translation <sup>1</sup>. The Nus factor complex comprises the four classical Nus factors, NusA, NusB, NusE (ribosomal  
31 protein S10), NusG, and a recently discovered member, SuhB. As a complex, Nus factors serve an important  
32 role in promoting expression of ribosomal RNA (rRNA) <sup>2,3</sup>. A NusB/E complex binds BoxA sequence elements  
33 in nascent rRNA, upstream of the 16S and 23S genes <sup>4,5</sup>. Once bound to BoxA, NusB/E has been proposed to  
34 interact with elongating RNAP via the NusE-NusG interaction <sup>6</sup>. The role of NusA in Nus complex function is  
35 unclear, but may involve binding of NusA to RNA flanking the BoxA <sup>7</sup>. NusA has also been proposed to be a  
36 general Rho antagonist by competing with Rho for RNA sites <sup>8</sup>. Early studies of Nus factors focused on their  
37 role in preventing both Rho-dependent and intrinsic termination of  $\lambda$  bacteriophage RNAs (“antitermination”) <sup>9</sup>,  
38 which is completely dependent on the bacteriophage protein N. Nus factors can prevent Rho-dependent  
39 termination in the absence of N <sup>10,11</sup>, and for many years, Nus factors were believed to prevent Rho-dependent  
40 termination of rRNA <sup>9</sup>. However, it was recently shown that rRNA is intrinsically resistant to Rho termination,  
41 and that the primary role of Nus factors at rRNA is to promote proper RNA folding during ribosome assembly  
42 <sup>3,12</sup>.

43  
44 The most recently discovered Nus factor, SuhB, has been proposed to stabilize interactions between the  
45 NusB/E-bound BoxA and elongating RNAP, thus contributing to proper folding of rRNA <sup>12</sup>. Genome-wide  
46 approaches revealed that *suhB* is upregulated in the presence of the Rho inhibitor bicyclomycin, suggesting that  
47 *suhB* is subject to premature Rho-dependent transcription termination <sup>13,14</sup>. Surprisingly, *suhB* is also one of the  
48 most upregulated genes in  $\Delta nusB$  cells <sup>12</sup>, suggesting a possible autoregulatory function for Nus factors.  
49 Moreover, autoregulation of *suhB* has been suggested previously <sup>15</sup>, although the mechanism for this regulation  
50 is unclear. Here, we show that *suhB* is translationally repressed by Nus factors, which in turn leads to premature  
51 Rho-dependent transcription termination. This represents a novel mechanism for control of premature Rho-  
52 dependent termination, and is the first described cellular function for Nus factors beyond regulation of rRNA.

53 Moreover, the role of Nus factors at *suhB* is to *promote* Rho-dependent termination of *suhB*, in contrast to their  
54 established function in antagonizing Rho. Bioinformatic analysis suggests that regulation by Nus factors is  
55 widespread, and that autoregulation of *suhB*, *nusE* or *nusB* is a common phenomenon. We confirm Nus factor  
56 association with *suhB* mRNA in *Salmonella enterica*, and we demonstrate Nus factor regulation of an unrelated  
57 gene in *Citrobacter koseri*. Thus, our data show that Nus factors are important regulators with diverse targets  
58 and diverse regulatory mechanisms.

59

## 50 RESULTS

### 52 Rho-dependent termination within the *suhB* gene

53 Genome-wide analysis of Rho termination events suggested Rho-dependent termination within the *E. coli suhB*  
54 gene<sup>13,14</sup>. To confirm this, we used Chromatin Immunoprecipitation (ChIP) coupled with quantitative PCR  
55 (ChIP-qPCR) to determine RNAP association across the *suhB* gene in wild-type cells and cells expressing a  
56 mutant Rho (R66S) that has impaired termination activity, likely due to a defect in RNA loading<sup>16</sup>. In wild-type  
57 cells, we observed a large decrease in RNAP association at the 3' end of *suhB* relative to the 5' end. This  
58 decrease was substantially reduced in *rho* mutant cells (Fig. 1). Thus, our ChIP data independently support the  
59 observation of Rho termination within *suhB*<sup>13,14</sup>.

### 71 Nus factors are *trans*-acting regulators of *suhB*

72 Based on an approach used to identify modulators of Rho-dependent termination within *S. enterica chiP*<sup>17</sup>, we  
73 used a genetic selection to isolate 30 independent mutants defective in Rho-dependent termination within *suhB*  
74 (see Methods). All 30 strains isolated had a mutation in one of three genes: *nusB* (14 mutants), *nusE* (13  
75 mutants) or *nusG* (3 mutants) (Table S1). We then measured RNAP association across the *suhB* gene in wild-  
76 type,  $\Delta nusB$  and *nusE* mutant cells (*nusE* A12E mutant isolated from the genetic selection). Mutation of *nusB* or  
77 *nusE* increased RNAP binding at the *suhB* 3' end ~4-fold compared to wild-type cells (Fig. 1 and S1). We  
78 conclude that Nus factors promote Rho-dependent termination within the *suhB* gene. However, RNAP  
79 occupancy at the 3' end of *suhB* in *nusB* and *nusE* mutants was substantially lower than in the *rho* mutant (Fig.  
80 1 and S1). This difference may be due to spurious, non-coding transcripts arising from nearby intragenic  
81 promoters, which are widespread in *E. coli*<sup>18</sup> and are often terminated by Rho<sup>13,14</sup>.

### 33 A functional BoxA in the *suhB* 5' UTR

34 We identified a sequence in the *suhB* 5' UTR with striking similarity to *boxA* sequences from rRNA loci (Fig.  
35 S2). Moreover, this *boxA*-like sequence is broadly conserved across *Enterobacteriaceae* species (Fig. 2A and  
36 S3), suggesting that it is a genuine binding site for NusB/E. We generated a library of randomly mutated *suhB*-  
37 *lacZ* transcriptional fusions (see Methods), and identified fusions that had higher expression of *lacZ*. All  
38 identified mutants carried a single nucleotide change at one of five different positions within the putative *boxA*  
39 (Fig. 2B). We then constructed a strain carrying two chromosomal point mutations in the putative *suhB boxA*  
40 (C4T/T6C; numbers corresponding to the position in the consensus *boxA*; Fig. S2). We used ChIP-qPCR to  
41 measure association of FLAG-tagged SuhB at the 5' end of the *suhB* gene in wild-type cells, or cells containing  
42 the *boxA* mutation. We detected robust association of SuhB-FLAG in wild-type cells, but not in the *boxA*  
43 mutant strain (Fig. 2C). We conclude that the putative BoxA in the 5' UTR of *suhB* is genuine, and recruits Nus  
44 factors. To test whether the BoxA controls Rho-dependent termination within *suhB*, we measured RNAP  
45 occupancy across *suhB* in the *boxA* mutant strain. We detected a ~4-fold increase in RNAP occupancy in the  
46 downstream portion of *suhB* in the *boxA* mutant strain relative to wild-type cells, mirroring the effect of  
47 mutating *nusB* or *nusE* (Fig. 1). Our data support a model in which Nus factor recruitment by the *suhB* BoxA  
48 leads to Rho-dependent termination within the gene.

### 49 50 **BoxA-mediated translational repression of *suhB* leads to intragenic Rho-dependent transcription** 51 **termination**

52 The *suhB* BoxA is separated by only 6 nt from the Shine-Dalgarno (S-D) sequence (Fig. 2A). Rho cannot  
53 terminate transcription of translated RNA, likely because RNAP-bound NusG interacts with ribosome-  
54 associated NusE (S10) <sup>6</sup>. Hence, we hypothesized that NusB/E association with BoxA sterically blocks  
55 association of the 30S ribosome with the mRNA, repressing translation initiation, uncoupling transcription and  
56 translation, and thereby promoting Rho-dependent termination. To test this hypothesis, we used the *suhB-lacZ*  
57 transcriptional fusion (Fig. 3A), as well as an equivalent translational fusion (Fig. 3B). We reasoned that  
58 mutation of *nusB*, *nusE*, or *boxA* would result in increased expression from both reporter fusions, since these

09 mutations would relieve translational repression (reported by the translational fusion), which in turn would  
10 reduce Rho-dependent termination (reported by the transcriptional fusion). In contrast, we reasoned that  
11 mutation of *rho* would result in increased expression only from the transcriptional fusion reporter, since the  
12 SuhB-LacZ fusion protein (from the translational fusion construct) would still be translationally repressed. We  
13 measured expression of *lacZ* from each of these reporter fusions in wild-type cells, and cells with  $\Delta nusB$ , *nusE*  
14 A12E, or *rho* R66S mutations. We also measured expression of *lacZ* in these strains using reporter fusions  
15 carrying the C4T/T6C *boxA* mutation. Consistent with our model, we detected increased expression of both  
16 reporter fusion types in mutants of *nusB*, *nusE* or *boxA*, whereas mutation of *rho* resulted in increased  
17 expression of the transcriptional fusion but not the translational fusion reporter (Fig. 3A-B). Note that mutation  
18 of *nusB*, *nusE* or *boxA* does not lead to the same level of increase in expression of the reporter fusions (Fig. 3A-  
19 B). This is likely due to the fact that mutations in Nus factors have extensive pleiotropic effects, presumably due  
20 to the importance of Nus factors in ribosome assembly<sup>3</sup>. Moreover, mutation of *boxA* in a *nusE* mutant leads to  
21 a further increase in reporter expression, whereas mutation of *boxA* in a *nusB* mutant does not (Fig. 3A-B). This  
22 is likely due to the mutant NusE retaining partial function, whereas deletion of *nusB* completely abolishes Nus  
23 factor function.

24  
25 To confirm the effects of mutating *nusB*, *nusE*, *rho* and *boxA* on expression of *suhB* in the native context, we  
26 measured SuhB protein levels by Western blotting using strains expressing a C-terminally FLAG-tagged  
27 derivative of SuhB. We compared SuhB protein levels in cells with *nusE* A12E, *rho* R66S, or *boxA* C4T/T6C  
28 mutations; we have previously shown that SuhB protein levels are increased in a  $\Delta nusB$  mutant<sup>12</sup>. SuhB protein  
29 levels in the mutant strains correlated well with the translational *suhB-lacZ* fusion reporter gene assay: mutation  
30 of *nusE* or *boxA* caused a modest increase in SuhB-FLAG levels, whereas mutation of *rho* had no discernible  
31 effect (Fig. 3C-D).

**Rho-dependent transcription termination occurs early in the *suhB* gene, and requires a Rho-loading sequence that overlaps the BoxA**

Rho-dependent termination requires a Rho loading sequence known as a Rut that typically occurs >60 nt upstream of the termination site(s), is pyrimidine-rich, and G-poor<sup>19</sup>. To localize the Rut and the downstream termination site(s), we constructed a short transcriptional *suhB-lacZ* fusion that includes only the first 57 bp of the *suhB* gene. Expression of this reporter fusion was substantially higher in *rho* mutant cells than in wild-type cells (Fig. 4A). In contrast, expression was only marginally higher in *rho* mutant cells than in wild-type cells when the *boxA* sequence was mutated (Fig. 4A). Thus, the short *suhB-lacZ* reporter fusion behaves similarly to the fusion that includes the entire *suhB* gene (Fig. 3A), indicating that the *rut* and termination sequences must be upstream of position 57 within *suhB*.

Given that the short *suhB-lacZ* fusion includes only 94 bp of transcribed sequence from *suhB* and its 5' UTR, and that Rut sequences are typically found >60 nt from the site(s) of termination<sup>19</sup>, we reasoned that the Rut is likely located close to the 5' end of the *suhB* 5' UTR. Consistent with this, positions 2-22 of the 5' UTR include 17 pyrimidines and only one G. This sequence completely encompasses the *boxA*, suggesting that the *boxA* and *rut* sequences overlap. To determine whether mutation of the *boxA* affects Rho-dependent termination independent of Nus factor-mediated translational repression, we constructed short *suhB-lacZ* fusions in which the *suhB* start codon was mutated, either alone or in conjunction with a mutated *boxA*. We reasoned that mutation of the *suhB* start codon would bypass the need for BoxA-mediated translational repression to cause Rho-dependent termination. As expected, expression of the fusion with the mutated start codon but wild-type *boxA* was substantially higher in a *rho* mutant than in wild-type cells (Fig. 4A), consistent with this construct being Rho-terminated. However, expression of the fusion with the mutated start codon and mutated *boxA* was only marginally higher in a *rho* mutant than in wild-type cells, indicating that Rho-dependent termination is disrupted by mutation of the *boxA*, even in the absence of *suhB* translation. We conclude that mutation of the *boxA* reduces Rho-dependent termination by disrupting the *rut*. This likely occurs due to the *boxA* and *rut*



58 sequences overlapping, in which case mutating the *boxA* would also alter the *rut*. However, mutation of the  
59 *boxA* might also alter RNA secondary structure of the *rut*.

50  
51 Mutation of the *boxA* results in greatly decreased Rho-dependent termination of a fusion of the entire *suhB* gene  
52 to *lacZ* (Fig. 3A). Although this effect could be due to disruption of a *rut* overlapping the *boxA*, we reasoned  
53 that there are likely to be additional *rut* sequences within the *suhB* ORF. To test this hypothesis, we constructed  
54 transcriptional fusions of the entire *suhB* gene and 5' UTR to *lacZ* with a mutation in the *suhB* start codon,  
55 either alone or in conjunction with a mutation in the *boxA*. For both constructs, expression was substantially  
56 higher in a *rho* mutant than in wild-type cells (Fig. 4B), indicating robust Rho-dependent termination within the  
57 *suhB* gene, even with a mutated *boxA*. We conclude that the *suhB* gene includes at least one additional *rut*, and  
58 that the effect of mutating the *boxA* on Rho-dependent termination with a long transcriptional fusion (Fig. 3) is  
59 due to loss of Nus factor binding rather than a direct effect on Rho loading.

### 70 71 **BoxA-mediated occlusion of the S-D sequence is not due to steric occlusion**

72 The data described above are consistent with a steric occlusion model in which NusB/E binding to the BoxA  
73 directly prevent 30S ribosome association with the Shine-Dalgarno sequence. However, other mechanisms of  
74 translational repression are also possible. The steric occlusion model predicts that increasing the distance  
75 between the *boxA* and S-D elements would relieve translational repression, and consequently Rho-dependent  
76 termination. We constructed *suhB-lacZ* transcriptional fusions that carried insertions of sizes from 2 to 100 bp  
77 between the *boxA* and S-D sequences (see Methods for details). We constructed equivalent fusions carrying a  
78 *boxA* mutation (C4A; Fig. S2). Surprisingly, separating the BoxA and S-D sequences with up to 100 nt  
79 intervening RNA did not abolish BoxA-mediated repression (Fig. 5). Note that differences in absolute  
80 expression levels for the different constructs are likely due to variability in secondary structure around the  
81 ribosome binding site. Additionally, we are confident that none of the insertions inadvertently introduces a new  
82 promoter, since a similar construct lacking an active upstream promoter was only weakly expressed (Fig. S4).

33 We conclude that the steric occlusion model is insufficient to explain BoxA-mediated translational repression of  
34 *suhB*, although the proximity of the BoxA and S-D sequences suggests that simple occlusion would prevent  
35 ribosome binding.

36  
37 We reasoned that if steric occlusion of ribosomes by NusB/E binding is sufficient for repression of *suhB*, it  
38 would not require assembly of a complete Nus factor complex, since NusB/E alone has a high affinity for BoxA  
39 RNA<sup>4</sup>. Hence, we constructed *suhB-lacZ* translational fusions where the native promoter is replaced by a T7  
40 promoter. Previous studies showed that gene regulation involving  $\lambda$  N or NusG is lost when *E. coli* RNAP is  
41 substituted with bacteriophage T7 RNAP<sup>20-22</sup>, suggesting that T7 RNAP does not interact with Nus factors;  
42 hence, transcription of this *suhB-lacZ* fusion by T7 RNAP would not be associated with formation of a  
43 complete Nus factor complex. We grew cells at 37 °C, 30 °C, or room temperature (23 °C), since the  
44 transcription elongation rate of T7 RNAP is similar to that of *E. coli* RNAP at room temperature, but  
45 considerably higher at 37 °C<sup>23,24</sup>. At all temperatures, we detected robust expression that was dependent upon  
46 expression of T7 RNAP in the same cells. However, we observed no effect on expression of mutating the *boxA*  
47 (Fig. S5). We conclude that efficient BoxA-dependent repression of *suhB* requires assembly of a complete Nus  
48 factor complex.

### 10 ***Salmonella enterica suhB* has a functional BoxA**

11 Phylogenetic analysis of the region upstream of the *suhB* gene indicates that the *boxA* sequence is widely  
12 conserved among members of the family *Enterobacteriaceae* (Fig. 2A; Fig. S2-3), suggesting that BoxA-  
13 mediated regulation of *suhB* occurs in these species. To investigate this possibility, we used ChIP of FLAG-  
14 tagged SuhB to measure association of SuhB with the *suhB* upstream region in *S. enterica* subspecies *enterica*  
15 serovar Typhimurium. We detected robust association of both RNAP ( $\beta$  subunit) and SuhB with the *suhB*  
16 upstream region (Fig. S6A-D), indicating that the *suhB* mRNA contains a functional BoxA. We also failed to

07 detect association with a previously reported cryptic BoxA within the *hisG* gene (Fig. S6), consistent with the  
08 sequence of this element differing at a critical position from the BoxA consensus (Fig. S2).

### 10 **BoxA-mediated regulation and Nus factor autoregulation are phylogenetically widespread phenomena**

11 Aside from their role in lambdoid phage, Nus factors have historically been considered dedicated regulators of  
12 rRNA expression. Our discovery of *suhB* as a novel regulatory target of Nus factors suggests that BoxA-  
13 mediated regulation may be more extensive. BoxA sequences in rRNA are known to be highly conserved <sup>2</sup>.  
14 Based on the *boxA* sequences from *E. coli* rRNA and *suhB* loci, and a previous analysis of sequences required  
15 for BoxA function in *E. coli* <sup>5</sup>, we derived a consensus sequence (GYTCTTTAANA) that is likely to be  
16 applicable to almost all  $\gamma$ -proteobacteria <sup>2</sup>. We searched for perfect matches to this sequence in 940 sequenced  
17  $\gamma$ -proteobacterial genomes. We then selected sequence matches that are positioned within 50 bp of a  
18 downstream start codon for an annotated gene. Thus, we identified 407 putative BoxA sequences from 314  
19 genomes, with between 0 and 7 instances per genome (Table S2). We determined whether any gene functions  
20 were identified from multiple genomes. To minimise biases from the uneven distribution of genome sequences  
21 across different genera, we analysed gene functions at the genus rather than species level. Across all the species  
22 analysed, we identified 36 different gene functions with at least one representative from one genus. Strikingly,  
23 we identified 34 of 55 genera in which at least one species has a putative *boxA* sequence within 50 bp of the  
24 start of an annotated *suhB* homologue. We identified three additional genera in which at least one species has a  
25 putative *boxA* within 50 bp of the start of an unannotated *suhB* homologue, and one genus with a species in  
26 which the *suhB* homologue has a putative *boxA* 82 bp from the gene start. Thus, our analysis reinforces the  
27 notion that BoxA-mediated regulation of *suhB* is highly conserved (Fig. 2A and S3). Three other gene functions  
28 were represented in multiple genera: *prsA* (encodes ribose-phosphate pyrophosphokinase) and *rpsJ* (encodes  
29 NusE) were each found in three genera, and genes encoding ParE-like toxins were found in two genera. We also  
30 identified two genera with species in which *rpsJ* is predicted to be a downstream gene in an operon where the  
31 first gene in the operon has a putative *boxA* <50 bp from the gene start.

32

### 33 **BoxA-mediated regulation of a toxin-antitoxin system in *Citrobacter koseri***

34 Bioinformatic analysis strongly suggested that BoxA-mediated regulation is evolutionarily widespread and  
35 extends to genes other than *suhB*. To determine whether Nus factors regulate genes other than rRNA and *suhB*  
36 in other species, we selected one putative BoxA-regulated gene identified by the bioinformatic search for *boxA*-  
37 like sequences: *CKO\_00699* from *C. koseri* (Fig. S2). *CKO\_00699* is predicted to encode a ParE-like toxin, part  
38 of a putative toxin-antitoxin pair. A putative *boxA* was observed upstream of a homologous gene in *Pasteurella*  
39 *multocida*, suggesting conserved BoxA-mediated regulation. We reasoned that if *CKO\_00699* is a genuine  
40 target of Nus factors, it would likely retain this regulation in *E. coli*, since Nus factors are highly conserved  
41 between *C. koseri* and *E. coli* (e.g. the amino acid sequence of NusB is 97% identical and 100% similar  
42 between the two species). Hence, we constructed a transcriptional fusion of *CKO\_00699* to *lacZ* and measured  
43 expression in *E. coli*. Note that we included a mutation in *CKO\_00699* (R82A) to inactivate the predicted toxin  
44 activity to prevent growth inhibition. The *lacZ* fusion included a strong, constitutive promoter<sup>25</sup>, and the  
45 sequence from *C. koseri* began at the predicted transcription start site, based on manual analysis of likely  
46 promoter sequences (Fig. 6). We measured expression of fusions with wild-type and mutant *boxA* (C4A)  
47 sequences (Fig. S2), in wild-type and  $\Delta nusB$  strains. Mutation of the putative *boxA*, or deletion of *nusB* resulted  
48 in a substantial increase in expression, whereas mutation of the *boxA* did not affect expression in the  $\Delta nusB$   
49 strain (Fig. 6). We conclude that *CKO\_00699* is directly repressed by a BoxA and Nus factors.

50

## 51 DISCUSSION

### 52 A model for BoxA-mediated repression of *suhB*

53 We have shown that premature Rho-dependent termination within the *suhB* gene is controlled by a BoxA and  
54 Nus factors. This likely serves as a mechanism for autoregulation of Nus factors, since SuhB is a critical  
55 component of the Nus machinery<sup>12</sup>. Premature Rho-dependent termination of mRNAs has been recently  
56 recognized to be a widespread regulatory mechanism<sup>26,27</sup>. Most regulation of this type occurs by alteration of  
57 mRNA accessibility around Rut sites. In the case of *suhB*, Rho-dependent termination occurs as a result of  
58 translational repression.

59  
60 A function for Nus factors in promoting Rho-dependent termination is particularly striking because of their long  
61 association with antitermination<sup>9</sup>. The contrasting effects of Nus factors on Rho-dependent termination in  
62 different contexts, and their role in promoting ribosomal assembly, highlight the flexibility in the function of  
63 these proteins. Our data indicate that translational repression of *suhB* by Nus factors is not due to occlusion of  
64 the S-D. Previous studies of Nus factors suggest that they form a loop between the BoxA in the RNA and the  
65 elongating RNAP<sup>3,12</sup>. We propose that this loop prevents the 30S ribosome from accessing the S-D.  
66 Alternatively, association of NusG with NusE in the context of the Nus factor complex may prevent translation  
67 by blocking association of NusG with ribosome-associated NusE (S10).

68  
69 Autoregulation of SuhB is strikingly similar to autoregulation of  $\lambda$  N.  $\lambda$  *nutL* is positioned ~200 bp upstream of  
70 the *N* gene. Binding of Nus factors and N to NutL results in translational repression of N<sup>28</sup>. The distance  
71 between NutL and the S-D sequence is such that a simple steric occlusion model is insufficient to explain  
72 translational repression by N and Nus factors; the RNA loop formed between NutL and the elongating RNAP  
73 provides a straightforward explanation of repression. Although the gap between NutL and the S-D sequence for  
74 the *N* gene is considerably longer than the longest distance we tested for *suhB* (Fig. 5), the intervening sequence  
75 is highly structured<sup>29</sup>, which may impact the compactness of the loop.

76

77 Although we have shown previously that Nus factors are not required to prevent Rho-dependent termination at  
78 rRNA loci <sup>12</sup>, Nus factors have been shown to prevent Rho-dependent termination in artificial reporter  
79 constructs <sup>10,11,30,31</sup>. Our finding that Nus factors promote Rho-dependent termination in *suhB* further indicates  
80 that context determines the precise function of Nus factors. Hence, it is likely that there are additional sequence  
81 elements in *suhB* that promote Rho-dependent termination, or that there are additional sequence elements in the  
82 artificial reporter constructs that prevent Rho-dependent termination.

83

### 84 **BoxA-mediated regulation beyond rRNA**

85 Our data support a widespread regulatory role for Nus factors, implicating them in regulation in both a wide  
86 range of species, and of a diverse set of genes, although within any given species there are likely only a few  
87 regulatory targets. Strikingly, ~25% of the gene functions associated with an upstream *boxA* are known to be  
88 directly connected to translation. This is consistent with the established connection between Nus factors and  
89 ribosomal assembly <sup>3</sup>, and suggests that the impact of Nus factors on translation occurs by regulation of a  
90 variety of genes. Moreover, our data suggest that NusE is autoregulated in phylogenetically diverse species.  
91 Although we did not identify any genomes where genes encoding other Nus factors have putative upstream  
92 *boxA* sequences, we did identify a putative *boxA* sequence upstream of *ribH* in six different species of  
93 *Pseudomonas*. In all cases, *nusB* is the gene immediately downstream of *ribH*, suggesting that *nusB* is  
94 autoregulated in pseudomonads. Overall, we identified no species with a putative *boxA* upstream of more than  
95 one Nus factor-encoding gene, and only 11 genera had no putative *boxA* associated with any Nus factor-  
96 encoding gene. However, for five of these latter genera we were unable to identify a *boxA* sequence upstream of  
97 the rRNA genes, suggesting that the BoxA consensus is different to that in *E. coli*. Thus, our data strongly  
98 suggest that Nus factor autoregulation occurs in ~90% of gamma-proteobacterial species, and that typically, just  
99 one Nus factor is autoregulated. The evidence for autoregulation of SuhB, NusE and NusB, suggests that the  
100 levels of these proteins contribute to feedback loops that control the primary function of Nus factors: promoting

01 ribosomal assembly. Our observation of BoxA-mediated regulation of a ParE-like toxin in *C. koseri*  
02 demonstrates that Nus factors regulate genes other than their own. Indeed, our bioinformatic analysis suggests  
03 that genes of many functions may be regulated by Nus factors, with 36 gene functions represented in at least  
04 one genus. Our list is conservative because (i) it does not consider the possibility of regulation by BoxA  
05 sequences located >50 nt upstream of the gene start, which we know is possible (Fig. 5), (ii) it does not consider  
06 non-coding RNAs, (iii) the BoxA consensus may be different in some of the species analysed, and (iv) gene  
07 starts predicted by bioinformatic annotation pipelines may be incorrect <sup>32</sup>.

## 09 **Conclusions**

10 Our data indicate that regulation by Nus factors extends to many genes beyond rRNA, and that Nus factor  
11 autoregulation is an evolutionarily widespread phenomenon. Moreover, we have shown that Nus factors can  
12 provide contrasting forms of regulation, depending on the context of the target; despite their long-established  
13 function in antitermination <sup>9</sup>, Nus factors promote Rho-dependent termination within *suhB*. Key questions about  
14 the function of Nus factors remain to be addressed. What is the molecular architecture of the Nus factor  
15 machinery? What are the specific RNA sequences that determine whether Nus factors prevent Rho-dependent  
16 termination? How do Nus factors modulate the function of elongating RNAP? Our identification of novel Nus  
17 factor target genes with novel regulatory mechanisms provides an excellent opportunity to address these  
18 questions.

## 20 MATERIALS AND METHODS

### 22 Strains and plasmids

23 All strains, plasmids and oligonucleotides used in this study are listed in Table S3 and Table S4. Mutations in  
24 *rpsJ* and *rho* were P1 transduced into MG1655<sup>33</sup> MG1655  $\Delta lacZ$  (AMD054)<sup>34</sup> and MG1655*suhB*-FLAG<sub>3</sub>  
25 (VS066)<sup>12</sup>. *E. coli* MG1655*suhB*(*boxA*(C4T/T6C)), MG1655*suhB*(*boxA*(C4T/T6C))-FLAG<sub>3</sub>, and *S.*  
26 Typhimurium *hisG* $\Delta$ +3::*thyA*, *hisG* $\Delta$ +100::*thyA* *suhB*-FLAG<sub>3</sub> strains were constructed using FRUIT<sup>35</sup>.

27  
28 Plasmids pGB1-pGB36, pGB67-68 were constructed by cloning the *suhB* gene and 200 bp of upstream  
29 sequence into the pAMD-BA-*lacZ* plasmid<sup>34</sup>, creating transcriptional or translational fusions to *lacZ*. Plasmids  
30 pGB192-pGB193 included 200 bp of upstream sequence and 57 nt of *suhB* coding sequence followed by a stop  
31 codon. Fusions carrying *boxA* mutations were made by amplifying a *suhB* fragment from GB023  
32 (*boxA*(C4T/T6C)) or by site-directed mutagenesis (*boxA*(C4A)); *suhB* start codon mutations (ATG→CAG)  
33 were made using site-directed mutagenesis. Insertions between the *boxA* and S-D sequences were generated by  
34 cloning fragments of random non-coding sequence ('GAACTACCCATCTGGTCGCAGATAGTATGAAC'),  
35 modified from<sup>36</sup>, for insertions of up to 32 bp; 40-100 bp insertions carried a non-coding sequence from the  
36 16S RNA gene in the reverse orientation (region from +1281 to +1380). The 5' end of the insert remained the  
37 same, and inserted sequence was extended towards the S-D sequence (see Fig. S7 for details). Plasmid pGB116  
38 was made by cloning the T7 RNAP gene with a S-D sequence into pBAD18<sup>37</sup>. Plasmids pGB83-95 carried the  
39 *suhB* gene and 36 nt of the 5'UTR with wt or mutant *boxA*, and a 100 nt insertion between the BoxA and S-D  
40 elements, where indicated. *suhB* was under the control of pT7 promoter and was translationally fused to *lacZ*  
41 reporter on pAMD-BA-*lacZ* plasmid<sup>34</sup>. Plasmids pGB109-110 were made by cloning CKO\_00699(R82A) gene  
42 with wt or mutant *boxA* (C4A) and a constitutive promoter<sup>25</sup>; the toxin gene was transcriptionally fused to *lacZ*  
43 reporter on pAMD-BA-*lacZ* plasmid.



## 15 **Isolation and identification of *trans*- and *cis*-acting mutants**

16 The *trans*-acting mutant genetic selection was performed using pAMD115 plasmid carrying a *suhB-lacZ*  
17 transcriptional fusion in MG1655  $\Delta lacZ$ . Bacterial cultures were grown at 37 °C in LB medium. 100  $\mu$ L of an  
18 overnight culture was washed and plated on M9 + 0.2% lactose agar. Spontaneous survivors were first tested for  
19 increased plasmid copy number using qPCR, comparing the Ct values of plasmid and chromosomal amplicons.  
20 Strains with increased copy number were discarded. To eliminate plasmid mutants, plasmids were isolated and  
21 transformed into a clean MG1655  $\Delta lacZ$  background and plated on MacConkey agar indicator plates; mutants  
22 forming red colonies (upregulated *suhB-lacZ*) were discarded. Chromosomal mutations were identified either  
23 by whole-genome sequencing, as described previously <sup>12</sup>, or by PCR amplification and sequencing of *nusB*,  
24 *nusE* and *nusG*. The *cis*-acting mutant genetic screen was performed by cloning a mutant *suhB* DNA library,  
25 generated by an error-prone DNA polymerase Taq (NEB) with oligonucleotides JW3605 and JW3606, into the  
26 pAMD-BA-*lacZ* vector, which was transformed into EPI300 background (*lac*<sup>-</sup>; Epicentre). The mutant library  
27 included the entire promoter, 5' UTR and gene. We selected mutants that were visibly upregulated on  
28 MacConkey agar plates and sequenced the insert to identify mutations.

## 30 **ChIP-qPCR**

31 Bacteria were grown at 37 °C in LB medium until OD<sub>600</sub>=0.5-0.6. ChIP-qPCR was performed as described  
32 previously <sup>34</sup>, using monoclonal mouse anti-RpoB (Neoclone #W0002) and M2 monoclonal anti-FLAG (Sigma)  
33 antibodies. Occupancy units were calculated as described previously <sup>12</sup>, normalizing to transcriptionally silent  
34 regions within the *bglB* or *ynbB* genes in *E. coli*, and the *sbcC* gene in *S. Typhimurium*.

## 36 **$\beta$ -galactosidase assays**

37 Bacterial cultures were grown at 37 °C in LB medium to an OD<sub>600</sub> of 0.5-0.6. 100  $\mu$ L of culture was used for  $\beta$ -  
38 galactosidase assays, as described previously <sup>34</sup>. LB medium was supplemented with 0.2% arabinose when

pBAD18 or its derivatives were used.  $\beta$ -galactosidase activity units were calculated as  $1000 \times (A_{420}/(A_{600})(\text{time}_{\text{min}}))$ .

## Western Blotting

Bacteria were grown at 37 °C in LB to an OD<sub>600</sub> of 0.5-0.6. Cell pellets were boiled in gel loading dye, separated on gradient polyacrylamide gels (Bio-Rad), and transferred to a PVDF membrane (Thermo Scientific). The membrane was probed with control mouse monoclonal anti-RpoC (BioLegend) antibody at 1:4000 dilution, or mouse monoclonal M2 anti-FLAG (Sigma) antibody at 1:10000 dilution. Goat anti-mouse horseradish peroxidase-conjugated antibody was used for secondary probing at 1:20000 dilution. Blots were developed with Clarity™ Western ECL Substrate (Bio-Rad).

## Sequence alignment of *subB* upstream regions

We extracted 100 bp of upstream sequence for *subB* homologues in 19 species of the family *Enterobacteriaceae*, and aligned the sequences using MUSCLE<sup>38</sup> (Fig. S3). To determine the % match to *E. coli* at each position, we added 1 to the number of perfect matches (to account for the *E. coli* sequence), divided by 20 (to account for the 20 species in the alignment), and converted to a percentage.

## Identification of putative *boxA* sequences in $\gamma$ -proteobacterial genomes

We searched all sequenced  $\gamma$ -proteobacterial genomes for annotated protein-coding genes with the sequence GYTCTTTAANA within the 50 nt upstream of the annotated gene start. We compared gene functions using COG annotations<sup>39</sup>.

31 **ACKNOWLEDGEMENTS**

32 We thank Dave Grainger, Don Court, Todd Gray and Keith Derbyshire for helpful discussions and comments  
33 on the manuscript. This work was supported by the NIH Director's New Innovator Award Program,  
34 1DP2OD007188 (JTW).

35

96 **AUTHOR CONTRIBUTIONS**

97 J.T.W., G.B. and N.S. designed the study. J.T.W. and G.B. wrote the manuscript. G.B., N.S., C.B., R.J., R.F.,  
98 M.P., A.M.S. and A.S. generated experimental data. P.L. performed bioinformatic analysis. All authors  
99 contributed to data analysis and interpretation.

10

## REFERENCES

1. Peters, J. M., Vangeloff, A. D. & Landick, R. Bacterial transcription terminators: the RNA 3'-end chronicles. *J Mol Biol* **412**, 793–813 (2011).
2. Arnvig, K. B. *et al.* Evolutionary comparison of ribosomal operon antitermination function. *J Bacteriol* **190**, 7251–7257 (2008).
3. Bubunenko, M. *et al.* Nus transcription elongation factors and RNase III modulate small ribosome subunit biogenesis in *Escherichia coli*. *Mol Microbiol* **87**, 382–393 (2012).
4. Luo, X. *et al.* Structural and functional analysis of the *E. coli* NusB-S10 transcription antitermination complex. *Mol Cell* **32**, 791–802 (2008).
5. Nodwell, J. R. & Greenblatt, J. Recognition of boxA antiterminator RNA by the *E. coli* antitermination factors NusB and ribosomal protein S10. *Cell* **72**, 261–268 (1993).
6. Burmann, B. M. *et al.* A NusE:NusG complex links transcription and translation. *Science* **328**, 501–504 (2010).
7. Prash, S. *et al.* RNA-binding specificity of *E. coli* NusA. *Nucleic Acids Res* **37**, 4736–4742 (2009).
8. Qayyum, M. Z., Dey, D. & Sen, R. Transcription Elongation Factor NusA Is a General Antagonist of Rho-dependent Termination in *Escherichia coli*. *J. Biol. Chem.* **291**, 8090–8108 (2016).
9. Sen, R., Chalissery, J., Muteeb, G. & Sep;3(1), E. P. 2008. Nus Factors of *Escherichia coli*. *EcoSal Plus* **3**, (2008).
10. Li, S. C., Squires, C. L. & Squires, C. Antitermination of *E. coli* rRNA transcription is caused by a control region segment containing lambda nut-like sequences. *Cell* **38**, 851–860 (1984).
11. Torres, M., Balada, J. M., Zellars, M., Squires, C. & Squires, C. L. In vivo effect of NusB and NusG on rRNA transcription antitermination. *J Bacteriol* **186**, 1304–1310 (2004).
12. Singh, N. *et al.* SuhB Associates with Nus Factors To Facilitate 30S Ribosome Biogenesis in *Escherichia coli*. *mBio* **7**, e00114-16 (2016).

- 26 13. Peters, J. M. *et al.* Rho directs widespread termination of intragenic and stable RNA transcription. *Proc*  
27 *Natl Acad Sci USA* **106**, 15406–15411 (2009).
- 28 14. Peters, J. M. *et al.* Rho and NusG suppress pervasive antisense transcription in Escherichia coli. *Genes Dev*  
29 **26**, 2621–2633 (2012).
- 30 15. Inada, T. & Nakamura, Y. Autogenous control of the *suH* gene expression of Escherichia coli. *Biochimie*  
31 **78**, 209–212 (1996).
- 32 16. Martinez, A., Opperman, T. & Richardson, J. P. Mutational analysis and secondary structure model of the  
33 RNP1-like sequence motif of transcription termination factor Rho. *J. Mol. Biol.* **257**, 895–908 (1996).
- 34 17. Bossi, L., Schwartz, A., Guillemardet, B., Boudvillain, M. & Figueroa-Bossi, N. A role for Rho-dependent  
35 polarity in gene regulation by a noncoding small RNA. *Genes Dev* **26**, 1864–1873 (2012).
- 36 18. Wade, J. T. & Grainger, D. C. Pervasive transcription: illuminating the dark matter of bacterial  
37 transcriptomes. *Nat. Rev. Microbiol.* **12**, 647–653 (2014).
- 38 19. Mitra, P., Ghosh, G., Hafeezunnisa, M. & Sen, R. Rho Protein: Roles and Mechanisms. *Annu. Rev.*  
39 *Microbiol.* (2017). doi:10.1146/annurev-micro-030117-020432
- 40 20. Barik, S., Ghosh, B., Whalen, W., Lazinski, D. & Das, A. An antitermination protein engages the  
41 elongating transcription apparatus at a promoter-proximal recognition site. *Cell* **50**, 885–899 (1987).
- 42 21. Pasmán, Z. & von Hippel, P. H. Regulation of rho-dependent transcription termination by NusG is specific  
43 to the Escherichia coli elongation complex. *Biochemistry (Mosc.)* **39**, 5573–5585 (2000).
- 44 22. Wilson, H. R., Zhou, J. G., Yu, D. & Court, D. L. Translation repression by an RNA polymerase elongation  
45 complex. *Mol Microbiol* **53**, 821–8 (2004).
- 46 23. Golomb, M. & Chamberlin, M. Characterization of T7-specific ribonucleic acid polymerase. IV. Resolution  
47 of the major in vitro transcripts by gel electrophoresis. *J. Biol. Chem.* **249**, 2858–2863 (1974).
- 48 24. Skinner, G. M., Baumann, C. G., Quinn, D. M., Molloy, J. E. & Hoggett, J. G. Promoter binding, initiation,  
49 and elongation by bacteriophage T7 RNA polymerase. A single-molecule view of the transcription cycle. *J.*  
50 *Biol. Chem.* **279**, 3239–3244 (2004).

- 51 25. Burr, T., Mitchell, J., Kolb, A., Minchin, S. & Busby, S. DNA sequence elements located immediately  
52 upstream of the -10 hexamer in Escherichia coli promoters: a systematic study. *Nucleic Acids Res.* **28**,  
53 1864–70 (2000).
- 54 26. Kriner, M. A., Sevostyanova, A. & Groisman, E. A. Learning from the Leaders: Gene Regulation by the  
55 Transcription Termination Factor Rho. *Trends Biochem Sci* **41**, 690–699 (2016).
- 56 27. Sedlyarova, N. *et al.* sRNA-Mediated Control of Transcription Termination in E. coli. *Cell* **167**, 111–121  
57 (2016).
- 58 28. Wilson, H. R., Kameyama, L., Zhou, J. G., Guarneros, G. & Court, D. L. Translational repression by a  
59 transcriptional elongation factor. *Genes Dev* **11**, 2204–2213 (1997).
- 50 29. Wilson, H. R., Yu, D., Peters, H. K. 3rd, Zhou, J. G. & Court, D. L. The global regulator RNase III  
51 modulates translation repression by the transcription elongation factor N. *EMBO J* **21**, 4154–4161 (2002).
- 52 30. Aksoy, S., Squires, C. L., Squires, C. & Jul;159(1):260-4., J. B. 1984. Evidence for antitermination in  
53 Escherichia coli rRNA transcription. *J Bacteriol* **159**, 260–264 (1984).
- 54 31. Squires, C. L., Greenblatt, J., Li, J., Condon, C. & Squires, C. L. Ribosomal RNA antitermination in vitro:  
55 requirement for Nus factors and one or more unidentified cellular components. *Proc Natl Acad Sci U A* **90**,  
56 970–4 (1993).
- 57 32. Richardson, E. J. & Watson, M. The automatic annotation of bacterial genomes. *Brief. Bioinform.* **14**, 1–12  
58 (2013).
- 59 33. Blattner, F. R. *et al.* The complete genome sequence of Escherichia coli K-12. *Science* **277**, 1453–1462  
70 (1997).
- 71 34. Stringer, A. M. *et al.* Genome-Scale Analyses of Escherichia coli and Salmonella enterica AraC Reveal  
72 Non-Canonical Targets and an Expanded Core Regulon. *J Bacteriol* **196**, 660–671 (2014).
- 73 35. Stringer, A. M. *et al.* FRUIT, a scar-free system for targeted chromosomal mutagenesis, epitope tagging,  
74 and promoter replacement in Escherichia coli and Salmonella enterica. *PLoS One* **7**, e44841 (2012).

- 75 36. Chen, Q. & Kadner, R. J. Effect of altered spacing between uhpT promoter elements on transcription  
76 activation. *J Bacteriol* **182**, 4430–4436 (2000).
- 77 37. Guzman, L. M., Belin, D., Carson, M. J. & Beckwith, J. Tight regulation, modulation, and high-level  
78 expression by vectors containing the arabinose PBAD promoter. *J. Bacteriol.* **177**, 4121–4130 (1995).
- 79 38. Edgar, R. C. MUSCLE: multiple sequence alignment with high accuracy and high throughput. *Nucleic  
80 Acids Res* **32**, 1792–1797 (2004).
- 81 39. Galperin, M. Y., Makarova, K. S., Wolf, Y. I. & Koonin, E. V. Expanded microbial genome coverage and  
82 improved protein family annotation in the COG database. *Nucleic Acids Res* **43**, D261-269 (2015).
- 83 40. Carlomagno, M. S. & Nappo, A. The antiterminator NusB enhances termination at a sub-optimal Rho site. *J  
84 Mol Biol* **309**, 19–28 (2001).
- 85 41. Carlomagno, M. S. & Nappo, A. NusA modulates intragenic termination by different pathways. *Gene* **308**,  
86 115–28 (2003).
- 87 42. Datsenko, K. A. & Wanner, B. L. One-step inactivation of chromosomal genes in Escherichia coli K-12  
88 using PCR products. *Proc Natl Acad Sci USA* **97**, 6640–6645 (2000).



31 **FIGURE LEGENDS**

32  
33 **Figure 1. Transcription termination within *suhB* is dependent on Rho and Nus factors.** RNAP ( $\beta$ )  
34 enrichment at *suhB* 5' and 3' regions was measured using ChIP-qPCR in wild-type MG1655, *boxA*(C4T/T6C),  
35  $\Delta$ *nusB*, *nusE*(A12E) or *rho*(R66S) mutant strains. Values are normalised to signal at the 5' end of *suhB*. *x*-axis  
36 labels indicate qPCR amplicon position relative to *suhB*. Error bars represent  $\pm 1$  standard deviation from the  
37 mean (n=3). A schematic depicting *suhB* gene, the transcription start site (bent arrow) and *boxA* (grey rectangle)  
38 is shown below the graph. Horizontal black lines indicate the position of PCR amplicons.

39  
40 **Figure 2. A functional BoxA in the 5' UTR of *suhB*.** (A) Sequence conservation of the 100 bp upstream of  
41 *suhB* and its homologues across 20 *Enterobacteriaceae* species. The transcription start site is indicated by a  
42 bent arrow, and the BoxA and S-D sequences are indicated. (B) List of *boxA* mutations that are associated with  
43 increased *suhB* expression. All single nucleotide changes are indicated by an arrow. Single underline indicates a  
44 mutation that was isolated in the absence of mutations anywhere else in the cloned region; other mutants  
45 included additional mutations outside the *boxA*. Double underline indicates that the *boxA* mutation was isolated  
46 in two or more independent clones. Critical position “-4” is indicated (See Fig. S2). (C) SuhB association with  
47 the 5' end of *suhB* in wild-type (“wt”) and *boxA* mutant (“*boxA* C4T/T6C”) strains. SuhB-FLAG occupancy  
48 was measured by ChIP-qPCR using  $\alpha$ -FLAG antibody. Error bars represent  $\pm 1$  standard deviation from the  
49 mean (n=3).

50  
51 **Figure 3. Nus factors repress translation of *suhB*, leading to Rho-dependent termination within the gene.**  
52  $\beta$ -galactosidase activity of (A) transcriptional and (B) translational fusions of *suhB* to *lacZ* in wild-type cells,  
53  $\Delta$ *nusB*, *nusE*(A12E), or *rho*(R66S) mutants. The *suhB-lacZ* fusion had either a wild-type (“wt”) or mutant *boxA*  
54 (“C4T/T6C”). Data are normalized to levels in wild type cells. Error bars represent  $\pm 1$  standard deviation from  
55 the mean (n=3). Schematics of constructs used in these experiments are depicted above the graphs. (C) and (D)

Western blots showing SuhB-FLAG protein levels in wild-type cells, *nusE*(A12E), *rho*(R66S) (C), and *boxA*(C4T/T6C) mutants (D). SuhB-FLAG was probed with  $\alpha$ -FLAG antibody; RNAP  $\beta'$  was probed as a loading control. Representative blots from at least three independent experiments are shown.

**Figure 4. The *suhB* BoxA overlaps the first of multiple Rut elements.**  $\beta$ -galactosidase activity of short (A) and full-length (B) *suhB* transcriptional fusion to *lacZ*. Constructs included either a wild-type sequence (“wt”), *boxA* mutation (“C4T, T6C”) and/or *suhB* start codon mutation (“ATG→CAG”), as indicated on the *x*-axis. 200 nt of the 5' UTR was included in all constructs. Error bars represent  $\pm 1$  standard deviation from the mean (n=3). Schematics of the constructs used for these experiments are depicted below the graphs.

**Figure 5. The effect on *suhB-lacZ* transcription levels of altering the distance between *boxA* and the S-D sequence.**  $\beta$ -galactosidase activity of wild-type (“wt *boxA*”; dark grey bars) and *boxA* mutant (“C4A”; blue bars) transcriptional fusions of *suhB* to *lacZ*, with increasing lengths of non-coding DNA inserted between the *boxA* and S-D sequences. The length of inserted sequence (nt) is indicated on the *x*-axis. Constructs include 200 bp of upstream sequence and a full-length *suhB* fused to *lacZ* in the pAMD-BA-*lacZ* plasmid. Note that the sequence of inserted non-coding DNA differs for constructs with insertion sizes of  $\leq 32$  bp and  $\geq 40$  bp (see Methods and Fig. S7 for details).

**Figure 6. Identification of BoxA elements in other bacterial species.**  $\beta$ -galactosidase activity of wild-type (“wt *boxA*”) and *boxA* mutant (“C4A”) transcriptional fusions of *CKO\_00699* (R82A mutant, to avoid potential toxicity to *E. coli* in the absence of the anti-toxin) to *lacZ* in *E. coli* wild-type (“wt”; dark grey bars) or *nusB* deletion (“ $\Delta$ *nusB*”; red bars) strains. *CKO\_00699-lacZ* expression was driven by a constitutive promoter<sup>25</sup>. Error bars represent  $\pm 1$  standard deviation from the mean (n=3).

11 **Figure S1. Transcription termination within *suhB* is dependent on Rho and Nus factors.** This is an  
12 extended version of Fig. 1. RNAP ( $\beta$ ) enrichment at regions across *suhB* was measured using ChIP-qPCR in wt  
13 MG1655, *boxA*(C4T/T6C),  $\Delta$ *nusB*, *nusE*(A12E) or *rho*(R66S) mutant strains. All values are normalised to the  
14 signal at the 5' end of *suhB* gene. *x*-axis labels indicate qPCR amplicon position relative to the *suhB* ORF. Error  
15 bars represent  $\pm 1$  standard deviation from the mean (n=3). A schematic depicting *suhB* gene, the transcription  
16 start site (bent arrow) and *boxA* (grey rectangle) is shown below the graph. The six horizontal black lines  
17 indicate the position of the PCR amplicons.

18  
19 **Figure S2. A list of relevant *boxA* sequences from *E. coli* and related bacteria.** Nucleotide positions are  
20 numbered 1-11 above the sequences. BoxA from rRNA is considered a consensus. A critical nucleotide  
21 important for Nus factor association is “C” at position 4<sup>13,23</sup>, and the mismatch in the *S. enterica* putative *hisG*  
22 BoxA sequence is underlined. *suhB* and *CKO\_00699 boxA* mutations used in this study are in bold.

23  
24 **Figure S3. MUSCLE (v3.8) Alignment (CLUSTAL Format) of 100 bp regions upstream of *suhB***  
25 **homologues in *Enterobacteriaceae* species.** Species names are indicated to the left of the alignment. Asterisks  
26 indicate positions that are 100% conserved across the 20 species.

27  
28 **Figure S4. The effect of 100 nt insertion between *boxA* and the S-D on *suhB-lacZ* expression levels when**  
29 **the native promoter is absent.**  $\beta$ -galactosidase assay of wild-type (“wt *boxA*”; dark grey bars) and *boxA*  
30 mutant (*boxA*(C4A); blue bars) *suhB* translational fusion to *lacZ*. The length of inserted sequence is indicated  
31 on the *x*-axis. The native *suhB* promoter was replaced by a T7 promoter (“pT7”; see schematic above the  
32 graph). Additionally, bacterial cells carried an empty pBAD18 vector (T7 RNAP was not supplied in this  
33 assay). Cells were grown in the presence of 0.2% arabinose. Error bars represent  $\pm 1$  standard deviation from the  
34 mean (n=3). Note that the  $\beta$ -galactosidase activity from the translational fusion construct shown here is

55 substantially lower than the activity from the equivalent transcriptional fusion construct with a native *suhB*  
56 promoter (Fig. 5, far right). Moreover,  $\beta$ -galactosidase activity from a wild-type *suhB-lacZ* translational fusion  
57 construct is ~8-fold higher than the activity from the equivalent transcriptional fusion construct ( $607\pm 8$  and  
58  $78\pm 3$   $\beta$ -galactosidase activity units, respectively). We conclude that the majority of  $\beta$ -galactosidase activity for  
59 the *suhB-lacZ* transcriptional fusion with a native promoter and a 100 nt insertion (Fig. 5, far right) is due to  
70 transcription from the native promoter.

71  
72 **Figure S5. *suhB* expression by T7 RNAP abolishes BoxA-mediated translational repression.**  $\beta$ -  
73 galactosidase assay of wild-type (“wt”) and *boxA* mutant (“C4A”) *suhB* translational fusions to *lacZ*. The native  
74 *suhB* promoter was replaced by a T7 promoter (“pT7”; see schematic below the graph). Additionally, bacterial  
75 cells carried a plasmid with either an empty pBAD18 vector or pBAD18 expressing T7 RNAP (as indicated on  
76 the *x*-axis).  $\beta$ -galactosidase activity was measured for cells grown in the presence of 0.2% arabinose to induce  
77 T7 RNAP expression at 37 °C, 30 °C or 23 °C as indicated in the legend. Error bars represent  $\pm 1$  standard  
78 deviation from the mean (n=3).

79  
80 **Figure S6. Evidence for and against functional BoxA elements upstream of *suhB* and inside *hisG* gene in**  
81 ***S. Typhimurium*, respectively.** Previous studies reported a functional BoxA within the *S. Typhimurium hisG*  
82 mRNA<sup>40,41</sup>. This putative BoxA was reported as being functional only when *hisG* translation was abolished by  
83 mutation of the gene. Hence, we interrupted *hisG* upstream of the putative *boxA* by inserting the *thyA* gene 3 bp  
84 or 100 bp downstream of the start codon. RNAP ( $\beta$ ) (**A and C**) and SuhB-FLAG (**B and D**) association with  
85 *thyA*, *hisG* and *suhB* was measured using ChIP-qPCR in a derivative of *S. Typhimurium* strain 14028s in which  
86 *thyA* was deleted at its native locus, and *hisG* was disrupted by insertion of *thyA*, replacing the first 3 (**A and B**)  
87 or 100 (**C and D**) nucleotides of *hisG*. *x*-axis labels indicate the qPCR amplicon used, with numbers  
88 corresponding to the schematics above the graphs. Error bars represent  $\pm 1$  standard deviation from the mean

39 (n=3). In the schematic, the *suhB boxA* and the putative *hisG boxA* are indicated by grey rectangles. Numbers  
30 above the arrows represent nucleotide positions relative to the *hisG* gene start (without *thyA* insertion).  
31 Horizontal black lines indicate the positions of PCR amplicons.

32  
33 **Figure S7. *suhB* gene sequence used in *lacZ* fusion constructs.** Relevant features used in this work are  
34 indicated: transcription start site (bent arrow), *boxA* sequence (single underline), S-D (double underline), start  
35 (“ATG”) and stop (“TAA”) codons (bold). The non-coding DNA sequence inserted between BoxA and S-D  
36 (Fig. 5) is shown in the box above, and the arrow points to the position of the insertion. Underlined nucleotides  
37 indicate the 3’ ends of various insertions and correspond to the insertion size labeled in Fig. 5. *suhB* sequence  
38 used in *lacZ* fusions in Fig. 3A-B included from position -200 to the end of the gene, as indicated by dashed  
39 lines. The short *suhB-lacZ* transcriptional fusion from Fig. 4B included *suhB* sequence up to position +57, and  
40 an in-frame stop codon immediately after the gene fragment.

41  
42 **Table S1. List of *nusB*, *nusE* and *nusG* mutants isolated in the genetic selection for factors that repress**  
43 ***suhB*.**

44 **Table S2. List of all genes in  $\gamma$ -proteobacteria with a putative *boxA* sequence  $\leq 50$  bp upstream.**

45 **Table S3. List of bacterial strains and plasmids used in this study.**

46 **Table S4. List of oligonucleotides used in this study.**

Figure 1

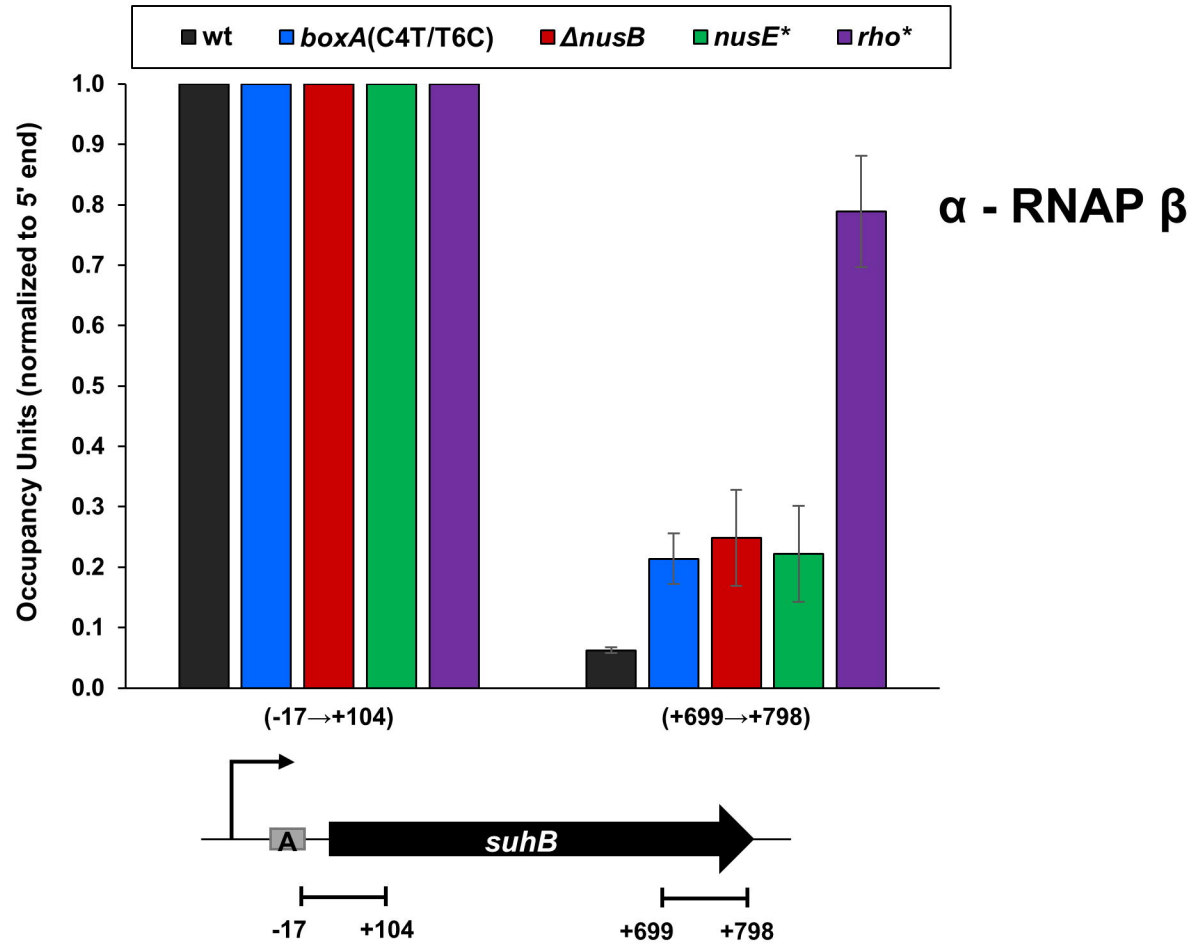

Figure 2

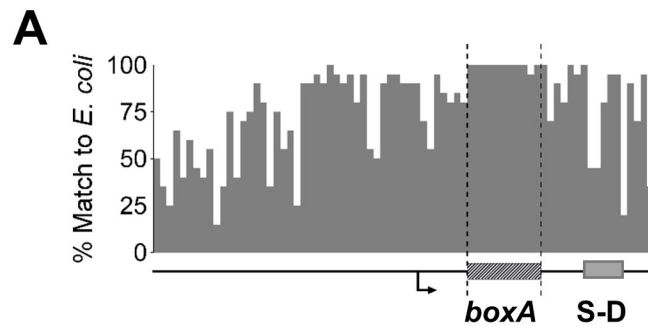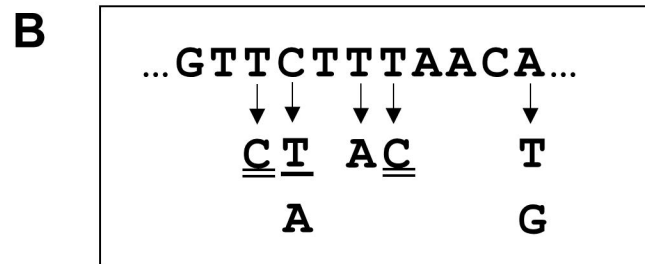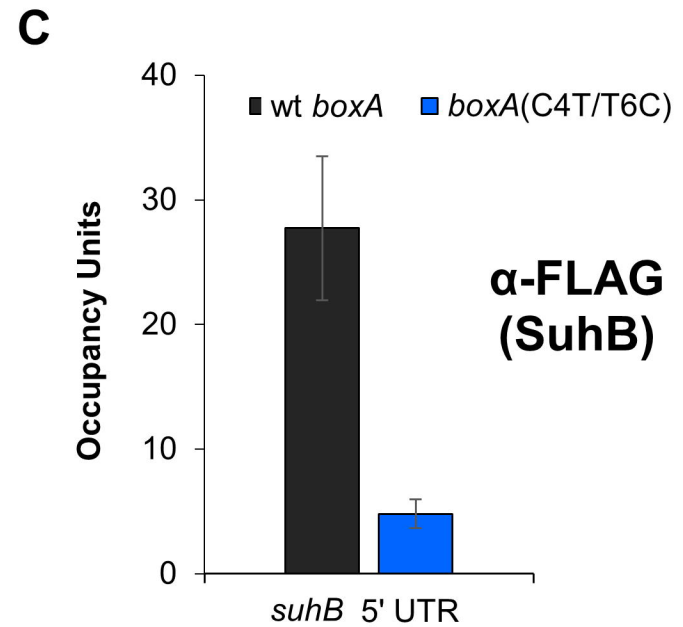

**Figure 3**

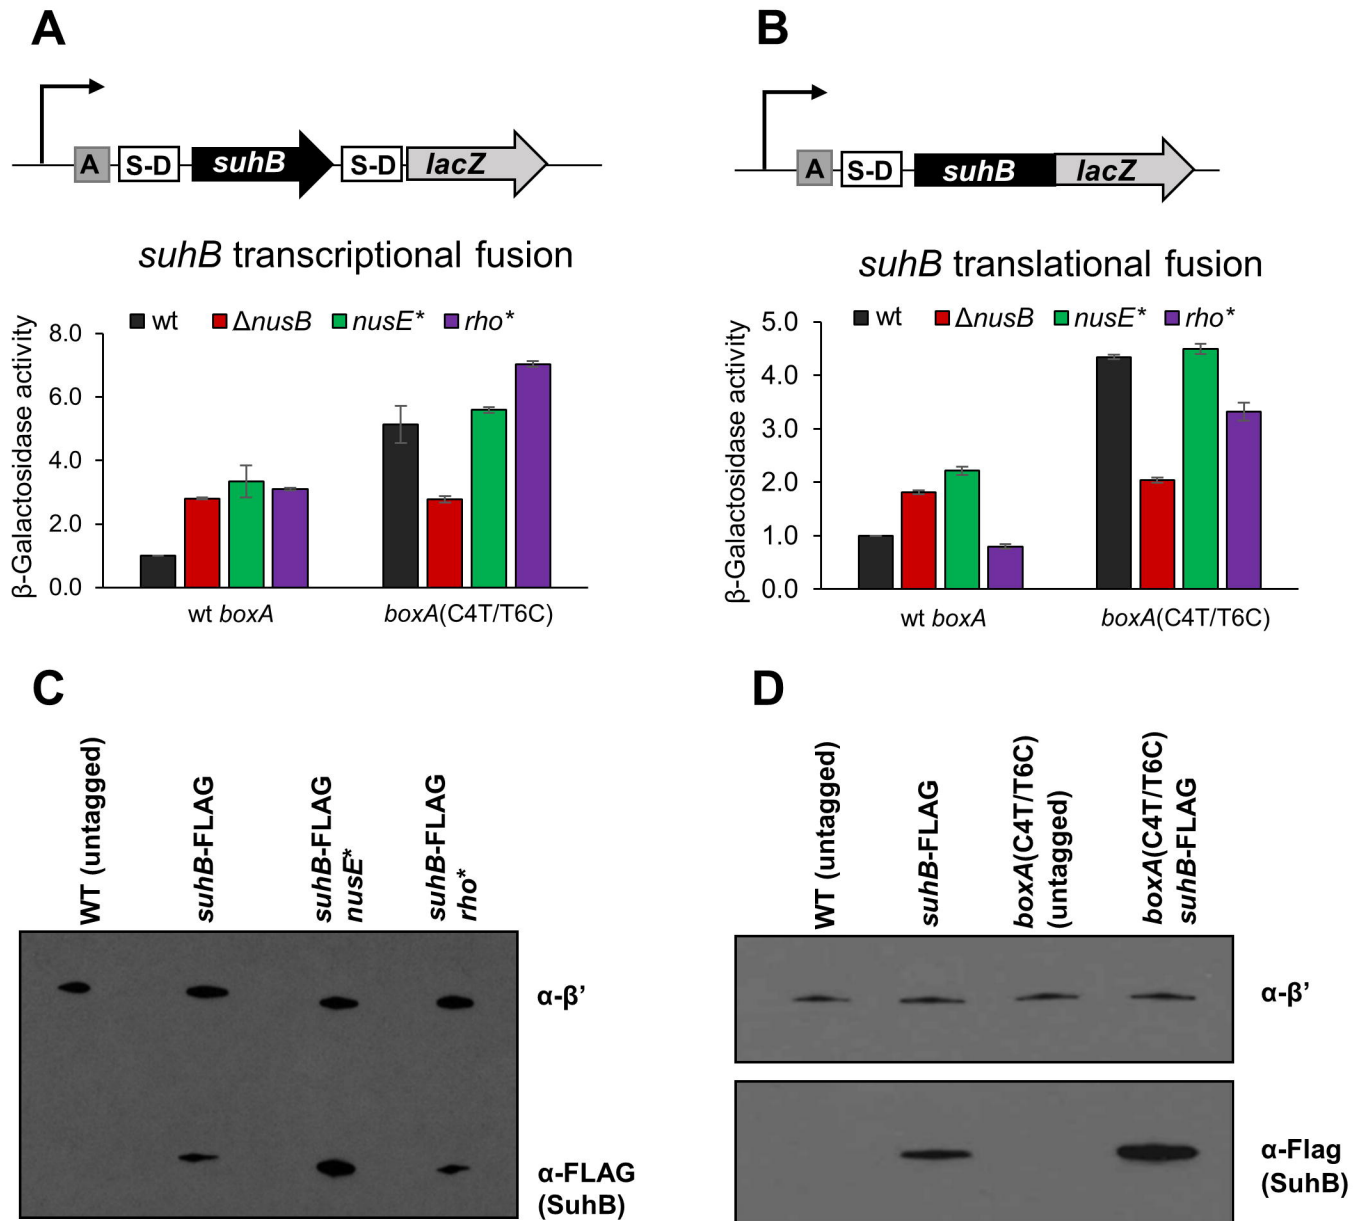



Figure 4

**A**

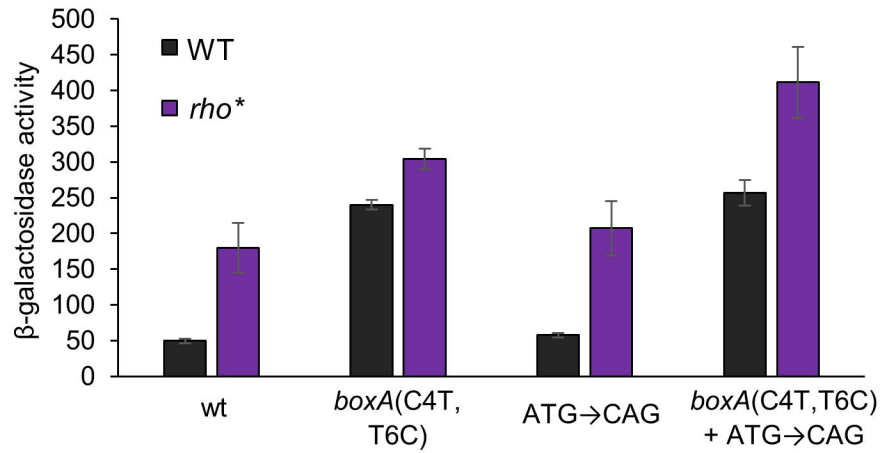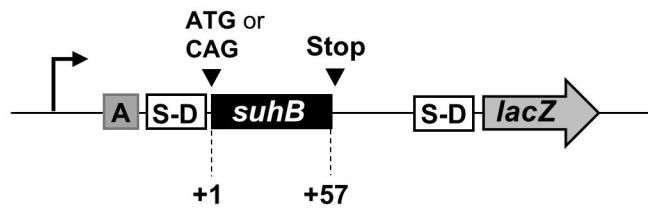

**B**

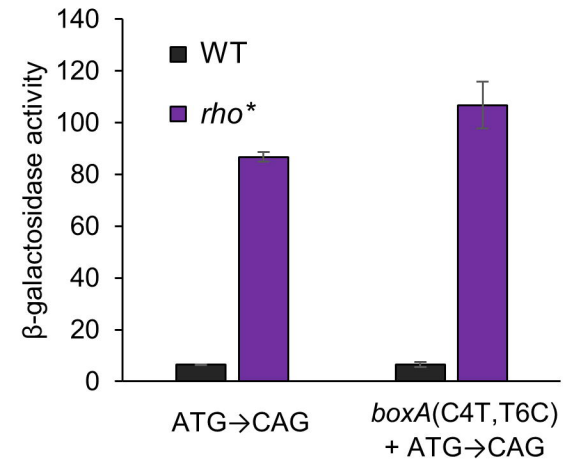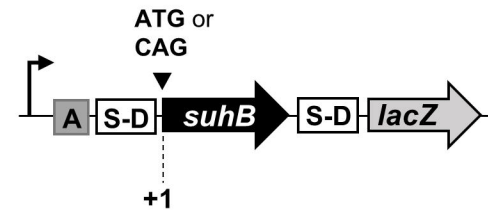

Figure 5

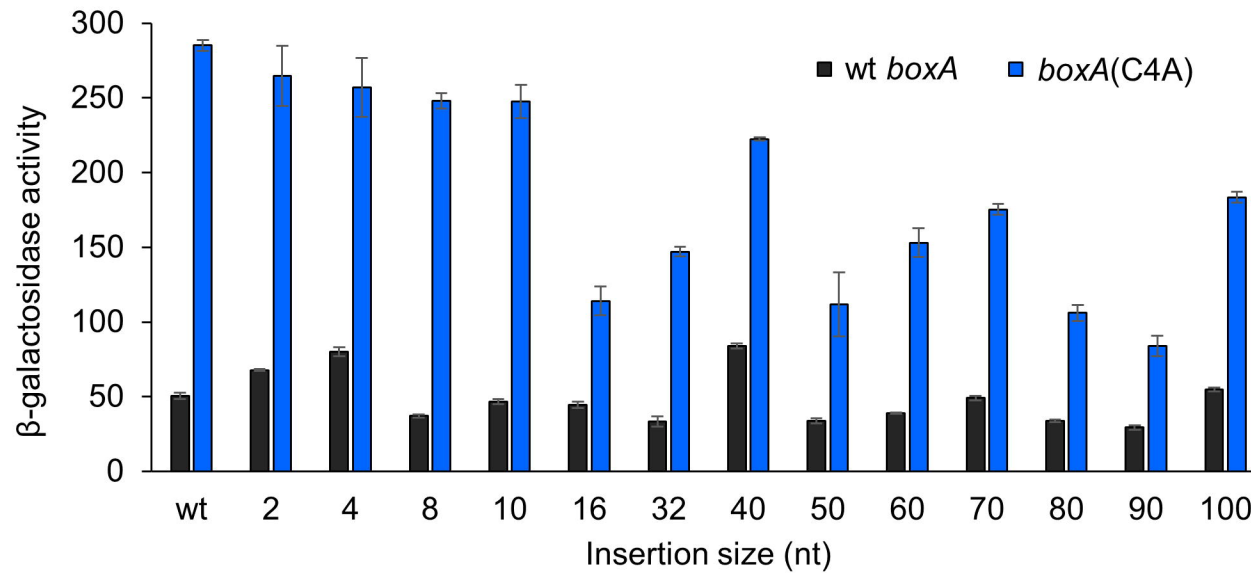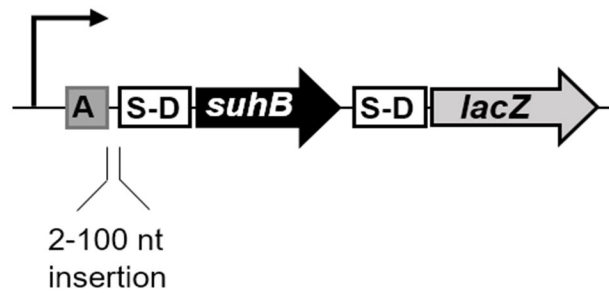

Figure 6

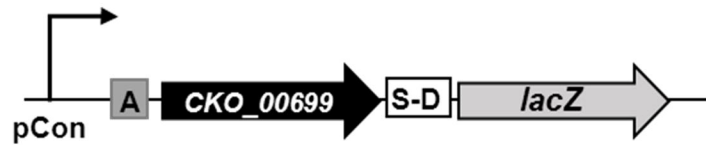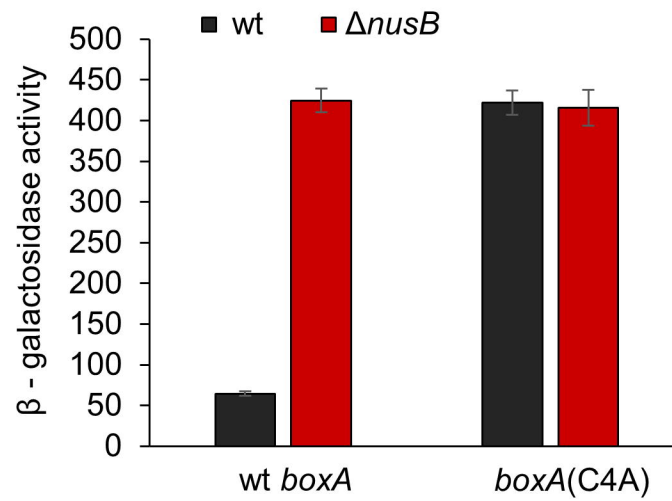

Source: http://biorxiv.org/content/10.1101/091223v2.full.pdf
